# Supplementary material
Source: PubMed Central journal article supplement (PMC4959215)
Supplement: AEM.00526-16_zam999117264so1.pdf [file AEM.00526-16_zam999117264so1.pdf]

## 1 **Supplementary Methods**

2

3 **One-step growth and phage adsorption rate tests:** The one-step growth curve and phage  
4 adsorption rate tests for phage B $\phi$ -C62 were performed as described previously with some  
5 modifications (1, 2). To evaluate the one-step growth curve of phage B $\phi$ -C62, bacterial cells  
6 were cultured in 5 ml LB medium ( $OD_{600} = 0.2$ ,  $10^5$  CFU/ml) for 2 h at 37°C and added to  
7 phage solutions at a multiplicity of infection (MOI) of 0.001. After incubation for 5 min, free  
8 phages in the mixture were removed by centrifugation, and the pellet was resuspended in 5  
9 ml fresh LB medium. Triplicate culture samples (100  $\mu$ l) were collected at 5 min intervals for  
10 the first 30 min and at 10 min intervals for the next 100 min. Samples were immediately  
11 examined for phage titration.

12 To estimate the adsorption rate, host bacteria were grown in LB broth ( $OD_{600} = 0.5$ ,  $10^8$   
13 CFU/ml) for 4 h at 37°C to the exponential phase and mixed with the phage solution at an  
14 MOI of 0.01. Mixed samples (100  $\mu$ l) were collected at 1, 2, 3, 4, 5, and 10 min. After  
15 immediate centrifugation, the supernatant fluids were used to determine the titer of  
16 unabsorbed phages using the double layer agar plate method.

17

18 **Thermal and pH stability tests:** Evaluation of thermal and pH phage stability was  
19 performed as described previously with some modifications (3). Concentrated phage samples  
20 ( $10^9$  PFU/ml) were incubated at the chosen temperature (RT, 37, 40, 50, 60, or 70°C) for 3, 6,  
21 or 9 h. Phage samples were also incubated at various pH levels (pH 4, 5, 6, 7, 7.5, 8, 9, and  
22 10) for 1, 3, or 5 days and 1 and 10 months. The percentage of phage titer (PFU/ml) was  
23 compared to that of the control samples (4°C, pH 7.5).

24

25 **Cytokine analysis:** Cytokine concentration (TNF- $\alpha$ , IL-6) in lung lysates and serum samples

26 was determined in duplicate using the commercial DuoSet ELISA kit (R&D Systems, MN,  
27 USA) according to the manufacturer's recommendations.

28

### 29 **Supplementary References**

30

- 31 1. **Lin NT, Chiou PY, Chang KC, Chen LK, Lai MJ.** 2010. Isolation and characterization  
32 of phi AB2: a novel bacteriophage of *Acinetobacter baumannii*. *Res Microbiol* **161**:308-  
33 314.
- 34 2. **Karumidze N, Kusradze I, Rigvava S, Goderdzishvili M, Rajakumar K, Alavidze Z.**  
35 2013. Isolation and characterisation of lytic bacteriophages of *Klebsiella pneumoniae*  
36 and *Klebsiella oxytoca*. *Curr Microbiol* **66**:251-258.
- 37 3. **Yang H, Liang L, Lin S, Jia S.** 2010. Isolation and characterization of a virulent  
38 bacteriophage AB1 of *Acinetobacter baumannii*. *BMC Microbiol* **10**:131.

39

40

41

42

43

44

45

46

47

48

49

50

51

52

53 **Supplementary Figures and Table**

54

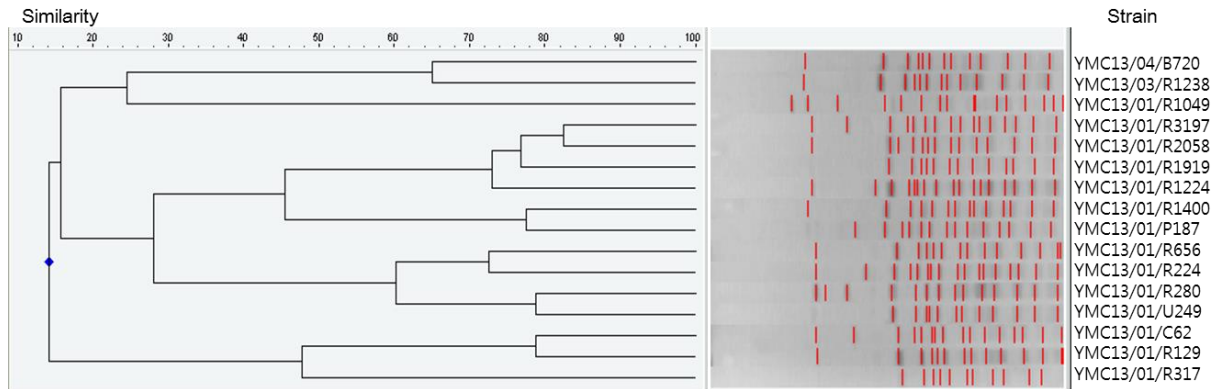

55

56 **Fig. S1.** PFGE pattern of *XbaI*-restricted chromosomal DNA from 16 clinical *A. baumannii*  
57 isolates. Each column indicates dendrogram analysis by InfoQuest FP software (version 4.50,  
58 Bio-Rad Laboratories, Inc), PFGE pattern using a CHEF-DR II system (Bio-Rad, Hercules,  
59 CA) and identical number of collected isolates. (electrophoresis conditions: 1% agarose; 6  
60 V/cm; high, 10 s; low, 3 s; in a linear manner for 20 h). Percent similarity is indicated on the  
61 scale.

62

63

64

65

66

67

68

69

70

71

72

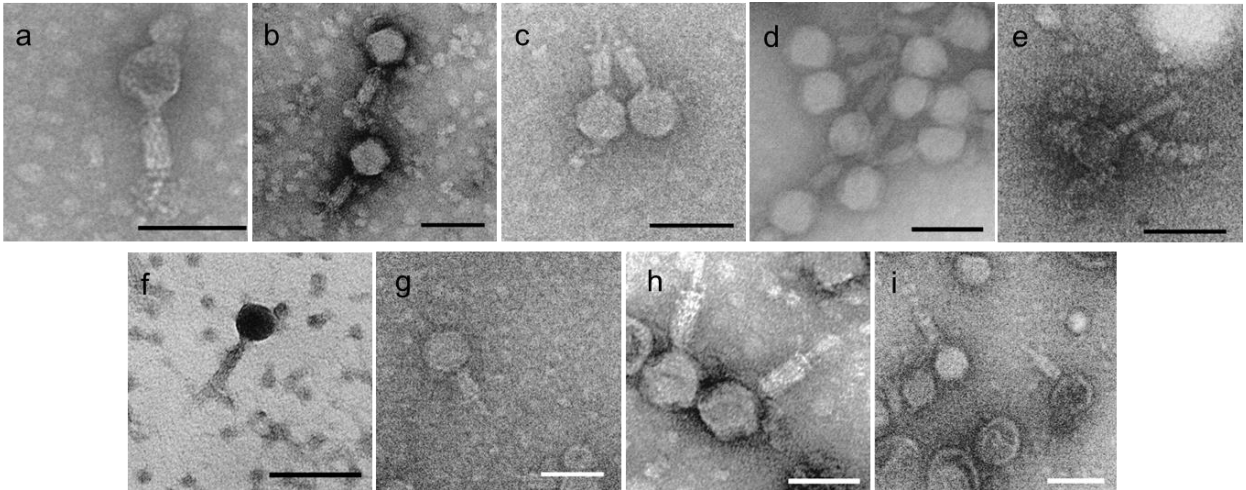

73

74 Fig. S2. Transmission electron microscopy images of 9 *A. baumannii* phages. (a) B $\phi$ -R129, (b)  
75 B $\phi$ -R430, (c) B $\phi$ -P447, (d) B $\phi$ -R1238, (e) B $\phi$ -R1520, (f) B $\phi$ -R2058, (g) B $\phi$ -R3128, (h) B $\phi$ -  
76 R3252, and (i) B $\phi$ -R3285. These *A. baumannii* phages belong to the *Myoviridae* family. Bar  
77 length of 100 nm.

78

79

80

81

82

83

84

85

86

87

88

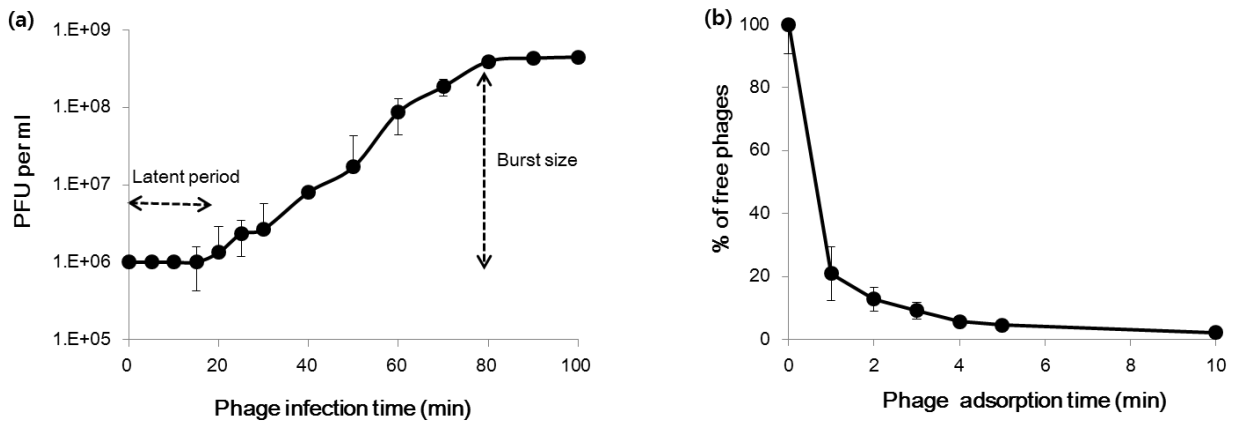

89

90 Fig. S3. One-step growth curve and adsorption rate of *A. baumannii* phage Bφ-C62. One-step  
 91 growth kinetics (a) and the adsorption rate (b) of phage Bφ-C62 were evaluated using the *A.*  
 92 *baumannii* YMC13/01/C62 host strain. The figure indicates a latent period of approximately  
 93 20 min and a burst size of 76 PFU/ml after 80 min (a) and shows that 80% of phages were  
 94 adsorbed onto the host bacteria at 1 min (b). Each time point is the mean of three independent  
 95 experiments, and the data are shown as the mean ± standard deviation.

96

97

98

99

100

101

102

103

104

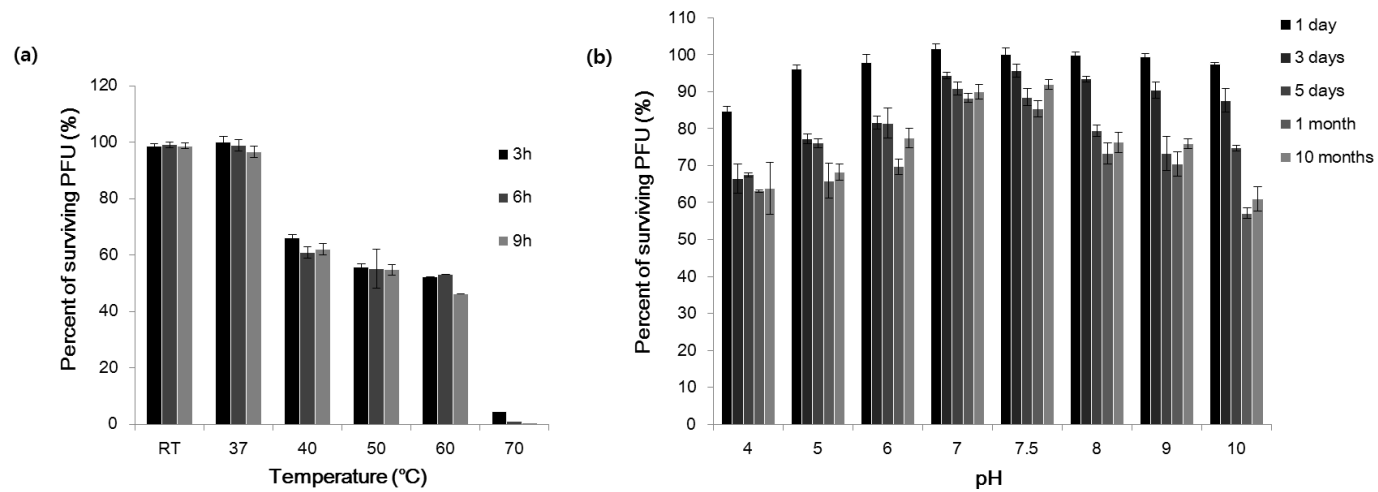

Fig. S4. The stability of *A. baumannii* phage B $\phi$ -C62 at various temperature and pH values. Phage were evaluated for stability kinetics at RT (25°C), 37°C, 40°C, 50°C, 60°C, and 70°C for 9 h (a) and at different pH values (between pH 4 to pH 10) for 10 months (b) at the indicated time points. These values are represented as the percentage of surviving phages at each experimental point. Phage B $\phi$ -C62 exhibited high stability at RT and 37°C for up to 9 h (a) and at pH 7 and 7.5 for 10 months (b). The results shown are the mean  $\pm$  standard deviation of triplicate experiments.

- █ Morphogenesis protein
- █ DNA replication and metabolism protein
- █ Lysis protein
- █ Hypothetical protein
- █ GC content
- █ GC skew+
- █ GC skew-

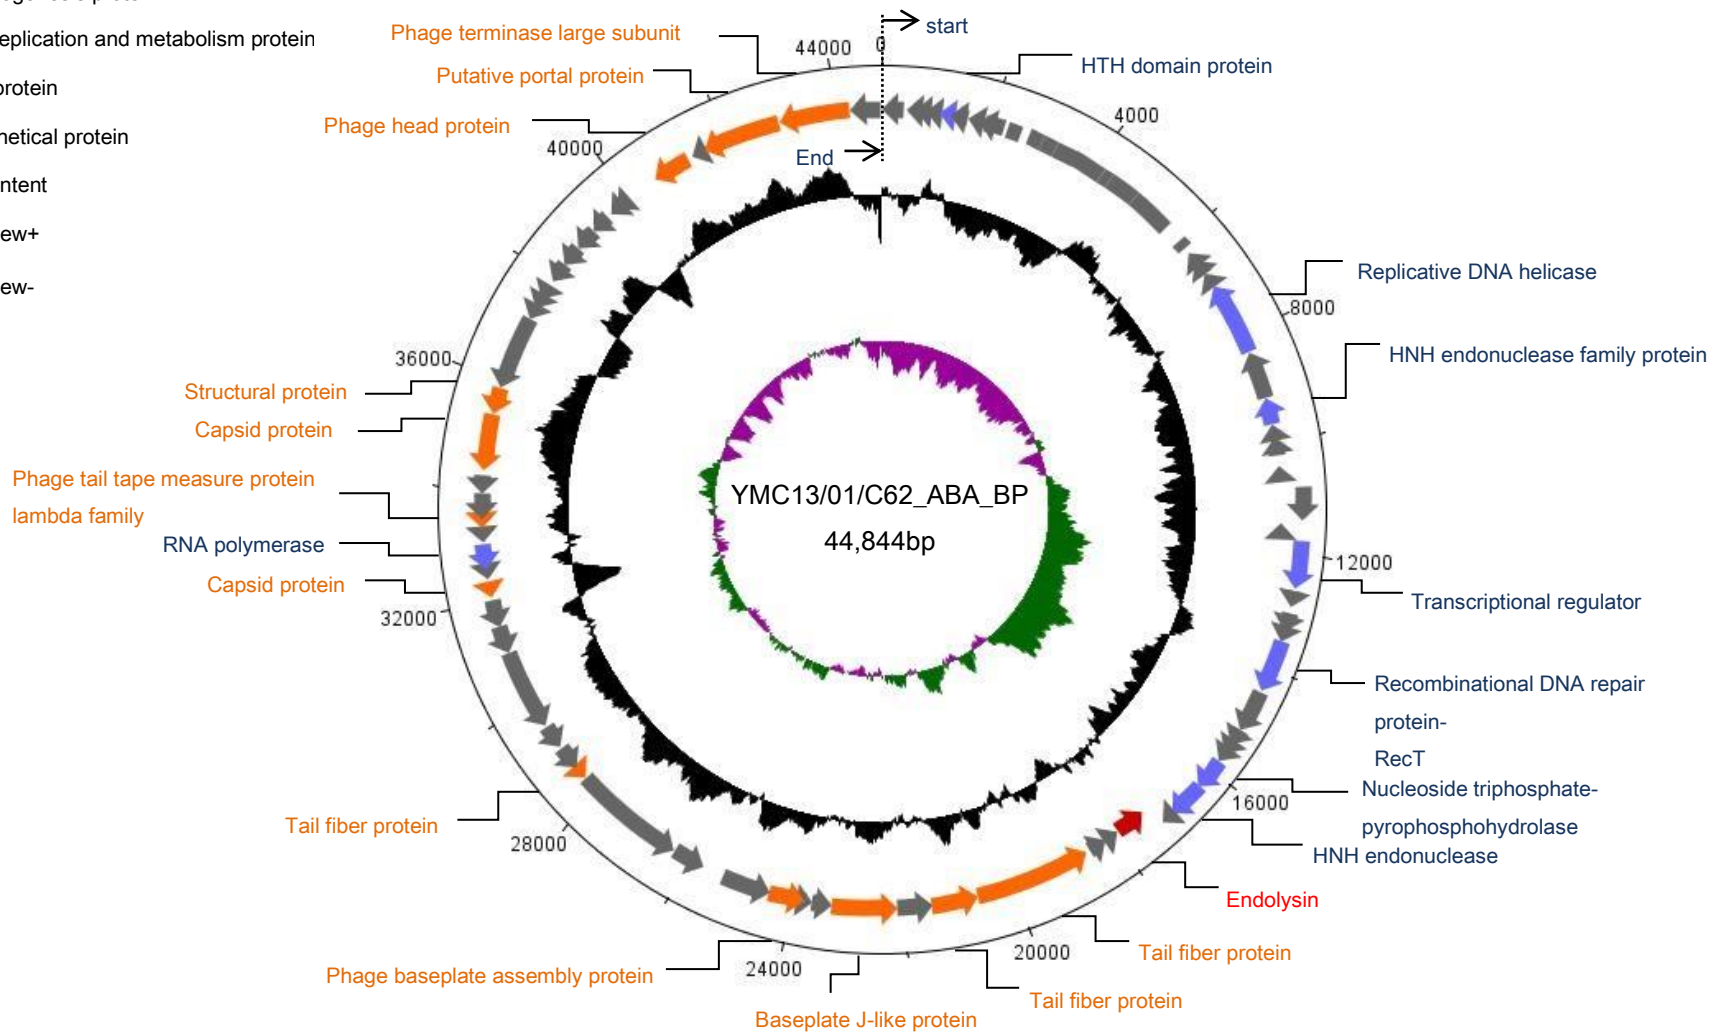

Fig. S5. Circular map of the *A. baumannii* phage B $\phi$ -C62 genome prepared using DNAPlotter software. The putative ORFs along with transcription direction are represented by arrows, and the functional proteins, GC content, and GC skew are indicated by different colors.



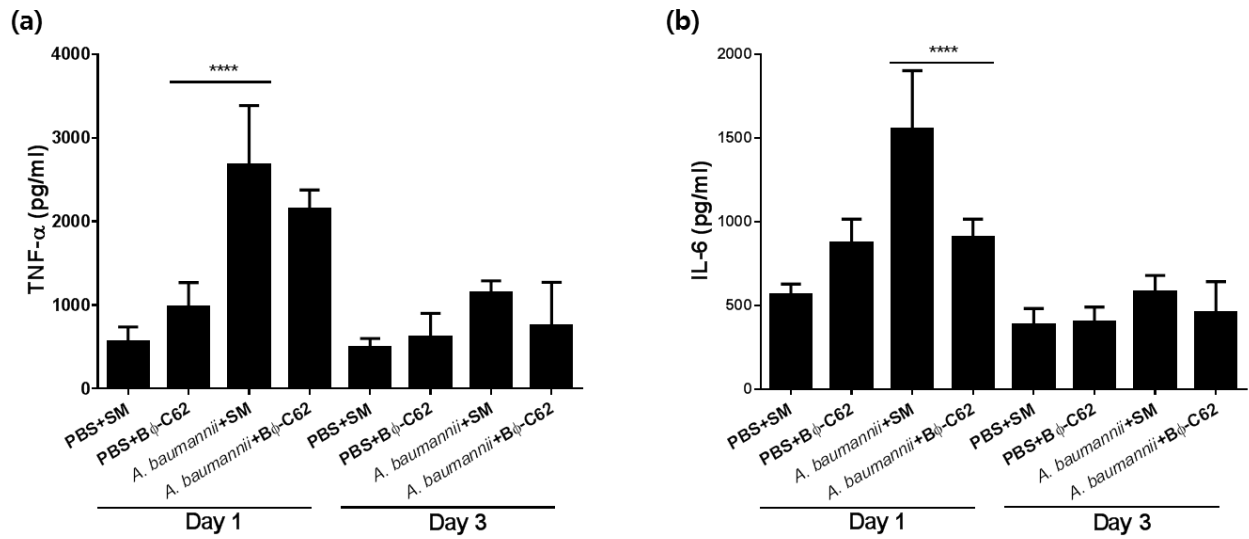

Fig. S6. Cytokine levels and histopathology changes in mouse lungs in intranasally (*A. baumannii* YMC13/01/C62)-infected mice or phage B $\phi$ -C62-treated mice. TNF- $\alpha$  (a) and IL-6 (b) levels were evaluated using ELISA. One-way ANOVA with Turkey's multiple comparisons test was used to compare cytokine levels. Significant differences (\*\*\*\* $p < 0.0001$ ) were observed at each time point.

Table S1. Antibiotic resistance profiles of *A. baumannii* strains used in this study<sup>a</sup> and host spectrum of *A. baumannii* phage Bφ-C62

| Host strain    | Amikacin | Ampicillin/<br>Sulbactam | Ceftazidime | Colistin | Cefepime | Cefotaxime | Gentamicin | Imipenem | Levofloxacin | Meropenem | Minocycline | Piperacillin/<br>Tazobactam | Cotrimoxazole | Tigecycline | Infectivity of<br>Bφ-C62 <sup>b</sup> |
|----------------|----------|--------------------------|-------------|----------|----------|------------|------------|----------|--------------|-----------|-------------|-----------------------------|---------------|-------------|---------------------------------------|
| YMC13/02/R323  | ≥64 (R)  | ≥32 (R)                  | ≥64 (R)     | ≤0.5 (S) | ≥64 (R)  | ≥64 (R)    | ≥16 (R)    | ≥16 (R)  | ≥8 (R)       | ≥16 (R)   | ≤4 (S)      | ≥128 (R)                    | ≥320 (R)      | ≤1 (S)      | -                                     |
| YMC13/02/R291  | ≥64 (R)  | ≤16 (I)                  | ≥64 (R)     | ≤0.5 (S) | ≥64 (R)  | ≥64 (R)    | ≥16 (R)    | ≥16 (R)  | ≥8 (R)       | ≥16 (R)   | ≤1 (S)      | ≥128 (R)                    | ≥320 (R)      | ≤2 (S)      | -                                     |
| YMC13/02/B1502 | ≥64 (R)  | ≥32 (R)                  | ≥64 (R)     | ≤0.5 (S) | ≥64 (R)  | ≥64 (R)    | ≥16 (R)    | ≥16 (R)  | ≥8 (R)       | ≥16 (R)   | ≤1 (S)      | ≥128 (R)                    | ≥320 (R)      | ≤1 (S)      | -                                     |
| YMC13/02/B1178 | ≤8 (S)   | ≥32 (R)                  | ≥64 (R)     | ≤0.5 (S) | ≥64 (R)  | ≥64 (R)    | ≤2 (S)     | ≥16 (R)  | ≥8 (R)       | ≥16 (R)   | ≤1 (S)      | ≥128 (R)                    | ≥320 (R)      | ≤1 (S)      | -                                     |
| YMC13/02/R931  | ≥64 (R)  | ≤8 (S)                   | ≥64 (R)     | ≤0.5 (S) | ≥64 (R)  | ≥64 (R)    | ≥16 (R)    | ≥16 (R)  | ≤4 (I)       | ≥16 (R)   | ≤4 (S)      | ≥128 (R)                    | ≥320 (R)      | ≤1 (S)      | -                                     |
| YMC13/02/R401  | ≥64 (R)  | ≥32 (R)                  | ≥64 (R)     | ≤0.5 (S) | ≥64 (R)  | ≥64 (R)    | ≥16 (R)    | ≥16 (R)  | ≥8 (R)       | ≥16 (R)   | ≤8 (I)      | ≥128 (R)                    | ≥320 (R)      | ≤2 (S)      | -                                     |
| YMC13/02/R426  | ≥64 (R)  | ≥32 (R)                  | ≥64 (R)     | ≤0.5 (S) | ≥64 (R)  | ≥64 (R)    | ≤1 (S)     | ≥16 (R)  | ≥8 (R)       | ≥16 (R)   | ≤8 (I)      | ≥128 (R)                    | ≥320 (R)      | ≤1 (S)      | -                                     |
| YMC13/02/R427  | ≥64 (R)  | ≥32 (R)                  | ≥64 (R)     | ≤0.5 (S) | ≥64 (R)  | ≥64 (R)    | ≤1 (S)     | ≥16 (R)  | ≥8 (R)       | ≥16 (R)   | ≤1 (S)      | ≥128 (R)                    | ≥320 (R)      | ≤1 (S)      | -                                     |
| YMC13/02/R464  | ≥64 (R)  | ≤8 (S)                   | ≥64 (R)     | ≤0.5 (S) | ≥64 (R)  | ≥64 (R)    | ≥16 (R)    | ≥16 (R)  | ≤4 (I)       | ≥16 (R)   | ≤1 (S)      | ≥128 (R)                    | ≥320 (R)      | ≤1 (S)      | -                                     |
| YMC13/02/U501  | ≥64 (R)  | ≤16 (I)                  | ≥64 (R)     | ≤0.5 (S) | ≥64 (R)  | ≥64 (R)    | ≥16 (R)    | ≥16 (R)  | ≥8 (R)       | ≥16 (R)   | ≤8 (I)      | ≥128 (R)                    | ≥320 (R)      | ≤2 (S)      | -                                     |
| YMC13/02/R319  | ≥64 (R)  | ≤8 (S)                   | ≥64 (R)     | ≤0.5 (S) | ≥64 (R)  | ≥64 (R)    | ≥16 (R)    | ≥16 (R)  | ≥8 (R)       | ≥16 (R)   | ≤8 (I)      | ≥128 (R)                    | ≥320 (R)      | ≤2 (S)      | -                                     |
| YMC13/02/P148  | ≥64 (R)  | ≥32 (R)                  | ≥64 (R)     | ≤0.5 (S) | ≥64 (R)  | ≥64 (R)    | ≥16 (R)    | ≥16 (R)  | ≥8 (R)       | ≥16 (R)   | ≤8 (I)      | ≥128 (R)                    | ≥320 (R)      | ≤2 (S)      | -                                     |
| YMC13/02/P177  | ≥64 (R)  | ≤8 (S)                   | ≥64 (R)     | ≤0.5 (S) | ≥64 (R)  | ≥64 (R)    | ≥16 (R)    | ≥16 (R)  | ≥8 (R)       | ≥16 (R)   | ≤8 (I)      | ≥128 (R)                    | ≥320 (R)      | ≥8 (R)      | -                                     |
| YMC13/02/B2199 | ≥64 (R)  | ≥32 (R)                  | ≥64 (R)     | ≤0.5 (S) | ≥64 (R)  | ≥64 (R)    | ≥16 (R)    | ≥16 (R)  | ≥8 (R)       | ≥16 (R)   | ≤1 (S)      | ≥128 (R)                    | ≥320 (R)      | ≤2 (S)      | -                                     |
| YMC13/02/P180  | ≥64 (R)  | ≤16 (I)                  | ≥64 (R)     | ≤0.5 (S) | ≥64 (R)  | ≥64 (R)    | ≥16 (R)    | ≥16 (R)  | ≥8 (R)       | ≥16 (R)   | ≤8 (I)      | ≥128 (R)                    | ≥320 (R)      | ≤2 (S)      | -                                     |
| YMC13/02/P335  | ≥64 (R)  | ≤16 (I)                  | ≥64 (R)     | ≤0.5 (S) | ≥64 (R)  | ≥64 (R)    | ≥16 (R)    | ≥16 (R)  | ≥8 (R)       | ≥16 (R)   | ≤8 (I)      | ≥128 (R)                    | ≥320 (R)      | ≤2 (S)      | -                                     |

<sup>a</sup>, Antibiotic resistance was determined by the disk diffusion test method.

‘Susceptible’, ‘Intermediate’ and ‘Resistant’ are abbreviated as ‘S’, ‘I’ and ‘R’.

<sup>b</sup>, Phage activity against collected bacteria: -, No plaque.

Table S1. (Continued) Antibiotic resistance profiles of *A. baumannii* strains used in this study<sup>a</sup> and host spectrum of *A. baumannii* phage Bφ-C62

| Host strain    | Amikacin | Ampicillin/<br>Sulbactam | Ceftazidime | Colistin | Cefepime | Cefotaxime | Gentamicin | Imipenem | Levofloxacin | Meropenem | Minocycline | Piperacillin/<br>Tazobactam | Cotrimoxazole | Tigecycline | Infectivity of<br>Bφ-C62 <sup>b</sup> |
|----------------|----------|--------------------------|-------------|----------|----------|------------|------------|----------|--------------|-----------|-------------|-----------------------------|---------------|-------------|---------------------------------------|
| YMC13/02/B2343 | ≥64 (R)  | ≥32 (R)                  | ≥64 (R)     | ≤0.5 (S) | ≥64 (R)  | ≥64 (R)    | ≥16 (R)    | ≥16 (R)  | ≥8 (R)       | ≥16 (R)   | ≤1 (S)      | ≥128 (R)                    | ≥320 (R)      | ≥8 (R)      | -                                     |
| YMC13/02/R796  | ≥64 (R)  | ≤16 (I)                  | ≥64 (R)     | ≤0.5 (S) | ≥64 (R)  | ≥64 (R)    | ≥16 (R)    | ≥16 (R)  | ≥8 (R)       | ≥16 (R)   | ≤1 (S)      | ≥128 (R)                    | ≥320 (R)      | ≤2 (S)      | -                                     |
| YMC13/02/R808  | ≥64 (R)  | ≥32 (R)                  | ≥64 (R)     | ≤0.5 (S) | ≥64 (R)  | ≥64 (R)    | ≥16 (R)    | ≥16 (R)  | ≤4 (I)       | ≥16 (R)   | ≤1 (S)      | ≥128 (R)                    | ≥320 (R)      | ≤2 (S)      | -                                     |
| YMC13/02/R855  | ≤8 (S)   | ≥32 (R)                  | ≥64 (R)     | ≤0.5 (S) | ≥64 (R)  | ≥64 (R)    | ≤1 (S)     | ≥16 (R)  | ≥8 (R)       | ≥16 (R)   | ≤1 (S)      | ≥128 (R)                    | ≥320 (R)      | ≤2 (S)      | -                                     |
| YMC13/02/R869  | ≥64 (R)  | ≥32 (R)                  | ≥64 (R)     | ≤0.5 (S) | ≥64 (R)  | ≥64 (R)    | ≥16 (R)    | ≥16 (R)  | ≥8 (R)       | ≥16 (R)   | ≤1 (S)      | ≥128 (R)                    | ≥320 (R)      | ≤1(S)       | -                                     |
| YMC13/02/R947  | ≥64 (R)  | ≤8 (S)                   | ≥64 (R)     | ≤0.5 (S) | ≥64 (R)  | ≥64 (R)    | ≥16 (R)    | ≥16 (R)  | ≤4 (I)       | ≥16 (R)   | ≤1 (S)      | ≥128 (R)                    | ≥320 (R)      | ≤2 (S)      | -                                     |
| YMC13/02/R972  | ≤8 (S)   | ≤16 (I)                  | ≥64 (R)     | ≤0.5 (S) | ≥64 (R)  | ≥64 (R)    | ≥16 (R)    | ≥16 (R)  | ≥8 (R)       | ≥16 (R)   | ≤1 (S)      | ≥128 (R)                    | ≥320 (R)      | ≤2(S)       | -                                     |
| YMC13/02/R978  | ≤8 (S)   | ≥32 (R)                  | ≥64 (R)     | ≤0.5 (S) | ≥64 (R)  | ≥64 (R)    | ≥16 (R)    | ≥16 (R)  | ≥8 (R)       | ≥16 (R)   | ≤2 (S)      | ≥128 (R)                    | ≥320 (R)      | ≤1 (S)      | -                                     |
| YMC13/02/R1138 | ≥64 (R)  | ≥32 (R)                  | ≥64 (R)     | ≤0.5 (S) | ≥64 (R)  | ≥64 (R)    | ≥16 (R)    | ≥16 (R)  | ≥8 (R)       | ≥16 (R)   | ≤1 (S)      | ≥128 (R)                    | ≥320 (R)      | ≤2 (S)      | -                                     |
| YMC13/02/R990  | ≥64 (R)  | ≥32 (R)                  | ≥64 (R)     | ≤0.5 (S) | ≥64 (R)  | ≥64 (R)    | ≥16 (R)    | ≥16 (R)  | ≥8 (R)       | ≥16 (R)   | ≤1 (S)      | ≥128 (R)                    | ≥320 (R)      | ≤2 (S)      | -                                     |
| YMC13/02/U1368 | ≥64 (R)  | ≥32 (R)                  | ≥64 (R)     | ≤0.5 (S) | ≥64 (R)  | ≥64 (R)    | ≥16 (R)    | ≥16 (R)  | ≥8 (R)       | ≥16 (R)   | ≤1 (S)      | ≥128 (R)                    | ≥320 (R)      | ≤2 (S)      | -                                     |
| YMC13/02/U1431 | ≥64 (R)  | ≥32 (R)                  | ≥64 (R)     | ≤0.5 (S) | ≥64 (R)  | ≥64 (R)    | ≥16 (R)    | ≥16 (R)  | ≥8 (R)       | ≥16 (R)   | ≤1 (S)      | ≥128 (R)                    | ≥320 (R)      | ≤2 (S)      | -                                     |
| YMC13/02/P267  | ≥64 (R)  | ≤16 (I)                  | ≥64 (R)     | ≤0.5 (S) | ≥64 (R)  | ≥64 (R)    | ≥16 (R)    | ≥16 (R)  | ≥8 (R)       | ≥16 (R)   | ≤1 (S)      | ≥128 (R)                    | ≥320 (R)      | ≥8 (R)      | -                                     |

<sup>a</sup>, Antibiotic resistance was determined by the disk diffusion test method.

‘Susceptible’, ‘Intermediate’ and ‘Resistant’ are abbreviated as ‘S’, ‘I’ and ‘R’.

<sup>b</sup>, Phage activity against collected bacteria: -, No plaque.

Table S2. *A. baumannii* phage B $\phi$ -C62 ORF summary.

| Gene no. | Range |       | Initiation codon | Strand | Length (bp) | Putative function                     | Annotation source                     | E-value | NCBI BlastP identity (%) | NCBI-Bank accession number |
|----------|-------|-------|------------------|--------|-------------|---------------------------------------|---------------------------------------|---------|--------------------------|----------------------------|
|          | start | stop  |                  |        |             |                                       |                                       |         |                          |                            |
| ORF1     | 5     | 394   | ATG              | -      | 390         |                                       |                                       |         |                          |                            |
| ORF2     | 448   | 615   | ATG              | -      | 168         |                                       |                                       |         |                          |                            |
| ORF3     | 602   | 808   | ATG              | -      | 207         |                                       |                                       |         |                          |                            |
| ORF4     | 798   | 1040  | ATG              | -      | 243         |                                       |                                       |         |                          |                            |
| ORF5     | 1037  | 1234  | ATG              | -      | 198         | Binding HTH domain                    | [ <i>Acinetobacter</i> phage IME-AB2] | 4E-37   | 100                      | AFV51517.1                 |
| ORF6     | 1237  | 1563  | ATG              | -      | 327         |                                       |                                       |         |                          |                            |
| ORF7     | 1563  | 1778  | GTG              | -      | 216         |                                       |                                       |         |                          |                            |
| ORF8     | 1771  | 1893  | ATG              | -      | 123         |                                       |                                       |         |                          |                            |
| ORF9     | 1890  | 2237  | ATG              | -      | 348         |                                       |                                       |         |                          |                            |
| ORF10    | 2301  | 2540  | ATG              | -      | 240         |                                       |                                       |         |                          |                            |
| ORF11    | 2681  | 2962  | GTG              | -      | 282         |                                       |                                       |         |                          |                            |
| ORF12    | 2949  | 3209  | ATG              | -      | 261         |                                       |                                       |         |                          |                            |
| ORF13    | 3206  | 3586  | ATG              | -      | 381         |                                       |                                       |         |                          |                            |
| ORF14    | 3579  | 4160  | ATG              | -      | 582         |                                       |                                       |         |                          |                            |
| ORF15    | 4157  | 4321  | GTG              | -      | 165         |                                       |                                       |         |                          |                            |
| ORF16    | 4318  | 4893  | ATG              | -      | 576         |                                       |                                       |         |                          |                            |
| ORF17    | 4890  | 5645  | ATG              | -      | 756         |                                       |                                       |         |                          |                            |
| ORF18    | 5971  | 6156  | ATG              | -      | 186         |                                       |                                       |         |                          |                            |
| ORF19    | 6256  | 6432  | ATG              | -      | 177         |                                       |                                       |         |                          |                            |
| ORF20    | 6429  | 6722  | ATG              | -      | 294         |                                       |                                       |         |                          |                            |
| ORF21    | 6719  | 6985  | ATG              | -      | 267         |                                       |                                       |         |                          |                            |
| ORF22    | 6996  | 8339  | ATG              | -      | 1344        | Replicative DNA helicase              | [ <i>Acinetobacter</i> phage IME-AB2] | 0       | 100                      | AFV51534.1                 |
| ORF23    | 8345  | 9211  | ATG              | -      | 867         |                                       |                                       |         |                          |                            |
| ORF24    | 9204  | 9683  | ATG              | -      | 480         | HNH endonuclease family protein       | [ <i>Acinetobacter</i> phage IME-AB2] | 3E-112  | 100                      | AFV51536.1                 |
| ORF25    | 9696  | 9908  | ATG              | -      | 213         |                                       |                                       |         |                          |                            |
| ORF26    | 9923  | 10258 | ATG              | -      | 336         |                                       |                                       |         |                          |                            |
| ORF27    | 10442 | 10630 | ATG              | -      | 189         |                                       |                                       |         |                          |                            |
| ORF28    | 10824 | 11411 | ATG              | +      | 588         |                                       |                                       |         |                          |                            |
| ORF29    | 11464 | 11658 | ATG              | -      | 195         |                                       |                                       |         |                          |                            |
| ORF30    | 11758 | 12570 | ATG              | +      | 813         | Transcriptional regulator             | [ <i>Acinetobacter</i> phage IME-AB2] | 0       | 99                       | AFV51542.1                 |
| ORF31    | 12637 | 12894 | ATG              | +      | 258         |                                       |                                       |         |                          |                            |
| ORF32    | 12987 | 13319 | ATG              | +      | 333         |                                       |                                       |         |                          |                            |
| ORF33    | 13319 | 13501 | ATG              | +      | 183         |                                       |                                       |         |                          |                            |
| ORF34    | 13498 | 14397 | ATG              | +      | 900         | Recombination DNA repair protein RecT | [ <i>Acinetobacter</i> phage IME-AB2] | 0       | 100                      | AFV51546.1                 |
| ORF35    | 14433 | 15149 | ATG              | +      | 717         |                                       |                                       |         |                          |                            |
| ORF36    | 15150 | 15443 | ATG              | +      | 294         |                                       |                                       |         |                          |                            |
| ORF37    | 15440 | 15631 | ATG              | +      | 192         |                                       |                                       |         |                          |                            |

|       |       |       |     |   |      |                                              |                                            |        |     |                |
|-------|-------|-------|-----|---|------|----------------------------------------------|--------------------------------------------|--------|-----|----------------|
| ORF38 | 15628 | 15789 | ATG | + | 162  |                                              |                                            |        |     |                |
| ORF39 | 15789 | 16349 | ATG | + | 561  | Nucleoside triphosphate pyrophosphohydrolase | [ <i>Acinetobacter</i> phage IME-AB2]      | 6E-52  | 57  | AFV51550.1     |
| ORF40 | 16336 | 16977 | ATG | + | 642  | HNH endonuclease                             | [ <i>Staphylococcus</i> phage SA5]         | 3E-34  | 43  | AFV80851.1     |
| ORF41 | 16970 | 17200 | GTG | + | 231  |                                              |                                            |        |     |                |
| ORF42 | 17354 | 17908 | ATG | - | 555  | Endolysin/ autolysin                         | [ <i>Acinetobacter</i> bacteriophage AP22] | 5E-130 | 98  | YP_006383807.1 |
| ORF43 | 17920 | 18144 | ATG | - | 225  |                                              |                                            |        |     |                |
| ORF44 | 18179 | 18514 | GTG | - | 336  |                                              |                                            |        |     |                |
| ORF45 | 18582 | 20678 | ATG | - | 2097 | Tail fiber protein                           | [ <i>Acinetobacter</i> phage IME-AB2]      | 5E-59  | 93  | AFV51555.1     |
| ORF46 | 20680 | 21510 | GTG | - | 831  | Tail fiber protein                           | [ <i>Acinetobacter</i> bacteriophage AP22] | 1E-119 | 70  | YP_006383803.1 |
| ORF47 | 21503 | 22129 | ATG | - | 627  |                                              |                                            |        |     |                |
| ORF48 | 22129 | 23313 | ATG | - | 1185 | Baseplate J-like protein                     | [ <i>Acinetobacter</i> phage IME-AB2]      | 0      | 99  | AFV51558.1     |
| ORF49 | 23310 | 23663 | ATG | - | 354  |                                              |                                            |        |     |                |
| ORF50 | 23660 | 23806 | ATG | - | 147  |                                              |                                            |        |     |                |
| ORF51 | 23809 | 24456 | ATG | - | 648  | Phage baseplate assembly protein             | [ <i>Acinetobacter</i> phage IME-AB2]      | 2E-154 | 99  | AFV51561.1     |
| ORF52 | 24437 | 25327 | GTG | - | 891  |                                              |                                            |        |     |                |
| ORF53 | 25716 | 26312 | ATG | - | 597  |                                              |                                            |        |     |                |
| ORF54 | 26320 | 28368 | ATG | - | 2049 |                                              |                                            |        |     |                |
| ORF55 | 28371 | 28613 | GTG | - | 243  | Tail-fiber                                   | [ <i>Acinetobacter</i> phage IME-AB2]      | 0      | 92  | AFV51565.1     |
| ORF56 | 28613 | 29038 | ATG | - | 426  |                                              |                                            |        |     |                |
| ORF57 | 29084 | 29533 | ATG | - | 450  |                                              |                                            |        |     |                |
| ORF58 | 29546 | 31009 | ATG | - | 1464 |                                              |                                            |        |     |                |
| ORF59 | 30999 | 31493 | ATG | - | 495  |                                              |                                            |        |     |                |
| ORF60 | 31490 | 31993 | ATG | - | 504  |                                              |                                            |        |     |                |
| ORF61 | 32038 | 32298 | ATG | - | 261  | Capsid protein                               | [ <i>Acinetobacter</i> bacteriophage AP22] | 0.16   | 33  | YP_006383780.1 |
| ORF62 | 32367 | 32552 | ATG | - | 186  |                                              |                                            |        |     |                |
| ORF63 | 32549 | 32986 | ATG | - | 438  | RNA polymerase                               | [ <i>Acinetobacter</i> phage IME-AB2]      | 2E-88  | 86  | AFV51492.1     |
| ORF64 | 33030 | 33215 | ATG | - | 186  |                                              |                                            |        |     |                |
| ORF65 | 33289 | 33435 | ATG | - | 147  | Phage tail tape measure protein              | [ <i>Snodgrassella</i> wkb2]               | 0.13   | 61  | AHN27888.1     |
| ORF66 | 33451 | 33903 | ATG | - | 453  | lambda family                                |                                            |        |     |                |
| ORF67 | 33903 | 34241 | ATG | - | 339  |                                              |                                            |        |     |                |
| ORF68 | 34321 | 35340 | ATG | - | 1020 | Capsid protein                               | [ <i>Acinetobacter</i> phage IME-AB2]      | 0      | 100 | AFV51496.1     |
| ORF69 | 35350 | 35829 | ATG | - | 480  | Structural protein                           | [ <i>Acinetobacter</i> phage IME-AB2]      | 3E-109 | 100 | AFV51497.1     |
| ORF70 | 35837 | 37171 | ATG | - | 1335 |                                              |                                            |        |     |                |
| ORF71 | 37171 | 37335 | ATG | - | 165  |                                              |                                            |        |     |                |
| ORF72 | 37385 | 37591 | ATG | - | 207  |                                              |                                            |        |     |                |
| ORF73 | 37581 | 37856 | ATG | - | 276  |                                              |                                            |        |     |                |
| ORF74 | 37955 | 38317 | ATG | - | 363  |                                              |                                            |        |     |                |
| ORF75 | 38314 | 38706 | ATG | - | 393  |                                              |                                            |        |     |                |
| ORF76 | 38699 | 39121 | ATG | - | 423  |                                              |                                            |        |     |                |

|       |       |       |     |   |      |                               |                                            |        |    |                |
|-------|-------|-------|-----|---|------|-------------------------------|--------------------------------------------|--------|----|----------------|
| ORF77 | 39111 | 39464 | ATG | - | 354  |                               |                                            |        |    |                |
| ORF78 | 39546 | 39692 | ATG | - | 147  |                               |                                            |        |    |                |
| ORF79 | 39693 | 39857 | ATG | - | 165  |                               |                                            |        |    |                |
| ORF80 | 40547 | 41254 | ATG | - | 708  | Phage head protein            | [ <i>Acinetobacter</i> phage IME-AB2]      | 1E-171 | 99 | AFV51508.1     |
| ORF81 | 41320 | 41577 | ATG | - | 258  |                               |                                            |        |    |                |
| ORF82 | 41564 | 42997 | ATG | - | 1434 | Portal protein                | [ <i>Acinetobacter</i> bacteriophage AP22] | 0      | 90 | YP_006383767.1 |
| ORF83 | 43001 | 44278 | ATG | - | 1278 | Phage terminase large subunit | [ <i>Acinetobacter</i> bacteriophage AP22] | 0      | 84 | YP_006383766.1 |
| ORF84 | 44275 | 44829 | TTG | - | 555  |                               |                                            |        |    |                |

---
